# Supplementary material
Source: PubMed Central journal article supplement (PMC2918736)
Supplement: NIHMS217379-supplement-01.pdf [file NIHMS217379-supplement-01.pdf]

**SUPPLEMENTAL PROCEDURES*****Strains, Plasmids, and Microbiological Techniques***

Yeast strains are listed in Table S1. Yeast and bacterial strains were manipulated by standard methods [1, 2]. All yeast strains were grown in standard YEPD media for 16 h unless otherwise indicated. Cells were pelleted by centrifugation and supernatants were used for immunoblot analysis and to examine properties of shed Flo11p. All mat/biofilm assays were performed on YEP with glucose or galactose containing 0.3% agar unless specified [3]. Epitope (hemagglutinin [HA] and MYC) fusions were constructed as indicated [4]. Gene disruptions and *GALI* promoter fusions were made by PCR-based methods [5, 6], including cassettes containing antibiotic resistant markers [7]. Integrations were confirmed by PCR analysis and phenotype. Flo11p-HA<sup>GPIA</sup> was constructed by making a C-terminal deletion of Flo11p from 1340 to 1367 aa residues by homologous recombination. Flo11p-HA and Flo11p-MYC fusion proteins showed equivalent shedding. Flo11p-HA and Myc<sup>30</sup>-Flo11p-HA showed wild type mat expansion and invasive growth, whereas Myc<sup>Δ29-95</sup>-Flo11p-HA showed a defect in mat expansion and agar invasion equivalent to a *flo11* mutant.

The plate-washing assay was performed as published [8]. Plasmids overexpressing *YPS1* (pDK63) and *YPS2* (pDK62) have been described [9], and were provided by Dr. Damian Krysan (University of Rochester Medical Center). NCBI blast and sequence comparison algorithms showed that Flo11p did not contain an autocatalytic SEA domain, characteristic of a subset of transmembrane mucins [10, 11]. *Saccharomyces Genome Database* was used to compile information about gene process

and function [12, 13]. Assays to evaluate mat form growth were based on established procedures [3]. Fluid volumes were determined by tilting agar plates at a 45° angle and collecting fluid that was released. All mat expansion assays were performed in duplicate unless otherwise noted, and error bars represent the standard deviation between experiments.

### ***Secretion Profile Analysis***

An ordered collection of ~5,400 ORFs under the control of the *GALI* inducible promoter was used [14] (Open Biosystems). Plasmid DNA was prepared from *Escherichia coli* in 96-well format. Colony transfer was performed using a 96- fixed pin pinning tool (V & P Scientific, 23 VP 408) and plate replication tool (V & P Scientific, VP 381). Sterilization was performed by sequential washes in 5% bleach, distilled water, 70% ethanol, and 95% ethanol. Plasmids were transformed into strains containing Flo11p-HA (PC2043) fusions by a high-throughput microtiter plate transformation protocol [15]. Transformants were pinned onto SD-URA and screened by pinning to S-GAL-URA on nitrocellulose membranes (Millipore, Billerica, CA) to induce plasmid-dependent overexpression of ORFs. Colonies were incubated for 48 h, at which point filters were washed in a stream of water to remove cells and probed by immunoblot analysis with antibodies that recognized the HA epitope (12CA5.16.4). Microscopic examination confirmed that cells were separated from filters. Cross-contamination was estimated at 0.8% based on growth in blank positions, and ~93% of the collection was examined. Aliquots of the collection were stored at -80°C. Comparative profiling was performed in strains containing Msb2p-

HA (PC999) and Hkr1p-HA (PC2740). Overexpression plasmids in strains containing Flo11p-HA are frozen in aliquots in -80°C and are available upon request.

### ***Immunoblots and Protein Analysis***

Immunoblots were performed as described [16]. Immunofluorescence was performed as described [17] using monoclonal antibodies against the HA epitope and Cy3-conjugated goat anti-mouse secondary antibodies (Jackson ImmunoResearch). For immunoblots of epitope tagged proteins, proteins were separated by SDS-PAGE on 10% precast gels (Bio-Rad, Hercules CA) and transferred to nitrocellulose membranes (protran BA85, VWR International Inc. Bridgeport NJ). Membranes were incubated in 10ml of blocking buffer (5% nonfat dry milk, 10mM Tris-HCl pH8, 150mM NaCl and 0.05% Tween 20) for 1 h at 25°C or 16h at 4°C. Preblocked membranes were incubated in blocking buffer containing primary antibodies for 1h at 25°C. Blots were washed 3 times for 5 min each in TBST (10mM Tris-HCl pH8, 150mM NaCl and 0.05% Tween 20). Blots were incubated in horseradish peroxidase (HRP) conjugated secondary antibodies for 1 h at room temperature, and washed as above. ECL Plus Immunoblotting reagent (GE Lifesciences) was used to detect proteins.

### ***Microscopy***

Differential-interference-contrast (DIC) and fluorescence microscopy using rhodamine filter sets were performed using an Axioplan 2 fluorescent microscope (Zeiss) with 5X, 10X, 20X, and 40X objectives, and a PLAN-APOCHROMAT 100X/1.4 (oil) objective (N.A. 0.17). Digital images were obtained with the Axiocam MRm camera (Zeiss).

Axiovision 4.4 software (Zeiss) was used for image acquisition. Intensity maps of the secretion profiles of Msb2p-HA and Flo11p-HA were generated using the ImageJ Plugin Interactive 3D Surface Plot (<http://rsbweb.nih.gov/ij/plugins/surface-plot-3d.html>).

**SUPPLEMENTAL FIGURE LEGENDS**

**Figure S1. Flo11p-HA is uniformly released from the cell surface by washing.** A) Wild-type cells expressing Flo11p-HA (PC2043) or control cells (PC538, No Tag) were grown for 16 h in YEP-GAL medium and transferred to YEP-GAL medium (Not Fixed) or YEP-GAL medium containing 3.9% formaldehyde (Fixed) for 1 h at 30°C to irreversibly fix Flo11p-HA to the surface. Cells were harvested by centrifugation and washed in buffer containing 50 mM TRIS pH 7 for 3 h at 4°C. Washed cells were incubated in Cy3-conjugated anti-HA antibodies for 1 h, washed 3 times in PBS and visualized by fluorescence microscopy using a 40X objective. Exposure times for each sample were 1 sec. DIC images of the cells in focus are shown in the upper panels. Bar, 50 microns. B) Quantitation of fluorescence intensity. Fluorescence intensity was determined using ImageJ. After background subtraction, total intensity values were divided by the number of cells. Two separate populations of cells were analyzed and the average value is shown. Error bars represent the standard deviation between samples.

**Figure S2. Purification of shed Flo11p.** A) Elution profile of precipitated mucins run on a sepharose CL-4B column. Peak “a” (fractions 4 and 5) corresponds to the elution of Flo11p in the void volume. Peaks b and c show the elution of smaller secreted proteins. B) Immunoblot showing supernatant (Sup Input) collected from cells overexpressing Flo11p that were grown for 48 h in S-GAL+AA medium. Flo11p-HA was precipitated from supernatants by addition of 8% polyethylene glycol (8% PEG) followed by centrifugation. Residual proteins that were not precipitated are also shown (Sup Final). C)

Silver stained blot on samples shown in Fig. S2B showing enrichment of Flo11p-HA following PEG precipitation. 'Pure' refers to the purified Flo11p-HA after elution and concentration.

**Figure S3. Flo11p is shed from mats in complex patterns.** A) Wild-type cells expressing Flo11p-HA (PC2043) were spotted onto YEPD media (0.3% agar) overlaid with a nitrocellulose filter and grown for 23 d. Bar, 1 cm. B) The mat of cells was washed off the nitrocellulose, which was probed by immunoblot using anti-HA antibodies. Bar, 1 cm. C) A region within the mat was selected (red square) which showed a complex zebra-striped pattern. D) Intensity map of Flo11p-HA shedding from the mat shown in panel C, using the ImageJ plugin Interactive 3D Surface Plot. All parameters were set to default values except smoothing, which was set to 1. At right, graph of intensity values (blue line) as compared to a control (grey line). Pixel Inspector was used to determine the intensity value (Y-axis) for each pixel in the selection (red line at left) over a given distance (100 pixels, 1 mm, X-axis). For the control intensity measurements, aliquots of purified Flo11p-HA were spotted onto nitrocellulose filters and analyzed by immunoblot analysis. Immunoblots were quantitated as above for variations in intensity for background fluctuations in image intensity. The patterns are likely the result of mucin expression, shedding, and stability differences and may reflect fine-tuning of adherence and lubrication functions in colonial microenvironments. *FLO11* expression is regulated by nutrient and pH levels [18, 19] both of which vary considerably in different parts of the biofilm [20]. E) A similar profile for Msb2p-HA secretion.

**Figure S4. Analysis of candidate Flo11p proteases and phospholipases.** A) Immunoblot analysis of S and P fractions for the indicated mutants. Cells were grown to mid-log phase in YEPD and harvested by centrifugation. Supernatant (S) and cell pellet (P) fractions were analyzed by SDS-PAGE followed by immunoblot analysis. WT, wild type (PC2043). B) Plate-washing assay of protease and phospholipase mutants. Equal concentrations of cells were spotted onto YEPD medium for 4 d at 30°C. Plates were photographed, rinsed in a stream of water and photographed again. For the lower panel, overexpression of *YPS1* or *YPS2* partially suppresses the invasive growth defect of the *kex2Δ* mutant, in line with a previous report [21], which is consistent with the idea that the protease activity of Kex2p is required for Flo11p function. The *kex2Δ* mutant harboring control and *YPS* overexpression plasmids were grown on YEP-GAL for 36h. C) Mats of the indicated genotypes were spotted onto YEPD + 0.3% agar for 4 d at 30°C. Bar, 1 cm.

## SUPPLEMENTAL REFERENCES

1. Sambrook, J., Fritsch, E.F., and Maniatis, T. (1989). *Molecular cloning: a laboratory manual*. Cold Spring Harbor Laboratory Press, Cold Spring Harbor, NY.
2. Rose, M.D., Winston, F., and Hieter, P. (1990). *Methods in yeast genetics*. Cold Spring Harbor Laboratory Press, Cold Spring Harbor, NY.
3. Reynolds, T.B., and Fink, G.R. (2001). Bakers' yeast, a model for fungal biofilm formation. *Science* *291*, 878-881.
4. Schneider, B.L., Seufert, W., Steiner, B., Yang, Q.H., and Futcher, A.B. (1995). Use of polymerase chain reaction epitope tagging for protein tagging in *Saccharomyces cerevisiae*. *Yeast* *11*, 1265-1274.
5. Baudin, A., Ozier-Kalogeropoulos, O., Denouel, A., Lacroute, F., and Cullin, C. (1993). A simple and efficient method for direct gene deletion in *Saccharomyces cerevisiae*. *Nucleic Acids Res* *21*, 3329-3330.
6. Longtine, M.S., McKenzie, A., 3rd, Demarini, D.J., Shah, N.G., Wach, A., Brachat, A., Philippsen, P., and Pringle, J.R. (1998). Additional modules for versatile and economical PCR-based gene deletion and modification in *Saccharomyces cerevisiae*. *Yeast* *14*, 953-961.
7. Goldstein, A.L., and McCusker, J.H. (1999). Three new dominant drug resistance cassettes for gene disruption in *Saccharomyces cerevisiae*. *Yeast* *15*, 1541-1553.
8. Roberts, R.L., and Fink, G.R. (1994). Elements of a single MAP kinase cascade in *Saccharomyces cerevisiae* mediate two developmental programs in the same cell type: mating and invasive growth. *Genes Dev* *8*, 2974-2985.
9. Krysan, D.J., Ting, E.L., Abeijon, C., Kroos, L., and Fuller, R.S. (2005). Yapsins are a family of aspartyl proteases required for cell wall integrity in *Saccharomyces cerevisiae*. *Eukaryot Cell* *4*, 1364-1374.
10. Bork, P., and Patthy, L. (1995). The SEA module: a new extracellular domain associated with O-glycosylation. *Protein Sci* *4*, 1421-1425.
11. Levitin, F., Stern, O., Weiss, M., Gil-Henn, C., Ziv, R., Prokocimer, Z., Smorodinsky, N.I., Rubinstein, D.B., and Wreschner, D.H. (2005). The MUC1 SEA module is a self-cleaving domain. *J Biol Chem* *280*, 33374-33386.
12. Cherry, J.M., Adler, C., Ball, C., Chervitz, S.A., Dwight, S.S., Hester, E.T., Jia, Y., Juvik, G., Roe, T., Schroeder, M., Weng, S., and Botstein, D. (1998). SGD: *Saccharomyces Genome Database*. *Nucleic Acids Res* *26*, 73-79.
13. Hong, E.L., Balakrishnan, R., Dong, Q., Christie, K.R., Park, J., Binkley, G., Costanzo, M.C., Dwight, S.S., Engel, S.R., Fisk, D.G., Hirschman, J.E., Hitz, B.C., Krieger, C.J., Livstone, M.S., Miyasato, S.R., Nash, R.S., Oughtred, R., Skrzypek, M.S., Weng, S., Wong, E.D., Zhu, K.K., Dolinski, K., Botstein, D., and Cherry, J.M. (2008). Gene Ontology annotations at SGD: new data sources and annotation methods. *Nucleic Acids Res* *36*, D577-581.
14. Gelperin, D.M., White, M.A., Wilkinson, M.L., Kon, Y., Kung, L.A., Wise, K.J., Lopez-Hoyo, N., Jiang, L., Piccirillo, S., Yu, H., Gerstein, M., Dumont, M.E., Phizicky, E.M., Snyder, M., and Grayhack, E.J. (2005). Biochemical and genetic analysis of the yeast proteome with a movable ORF collection. *Genes Dev* *19*, 2816-2826.



15. Gietz, R.D., and Schiestl, R.H. (2007). Microtiter plate transformation using the LiAc/SS carrier DNA/PEG method. *Nat Protoc* 2, 5-8.
16. Cullen, P.J., Sabbagh, W., Jr., Graham, E., Irick, M.M., van Olden, E.K., Neal, C., Delrow, J., Bardwell, L., and Sprague, G.F., Jr. (2004). A signaling mucin at the head of the Cdc42- and MAPK-dependent filamentous growth pathway in yeast. *Genes Dev* 18, 1695-1708.
17. Guo, B., Styles, C.A., Feng, Q., and Fink, G.R. (2000). A *Saccharomyces* gene family involved in invasive growth, cell-cell adhesion, and mating. *Proc Natl Acad Sci U S A* 97, 12158-12163.
18. Barrales, R.R., Jimenez, J., and Ibeas, J.I. (2008). Identification of novel activation mechanisms for FLO11 regulation in *Saccharomyces cerevisiae*. *Genetics* 178, 145-156.
19. Douglas, L.M., Li, L., Yang, Y., and Dranginis, A.M. (2007). Expression and characterization of the flocculin Flo11/Muc1, a *Saccharomyces cerevisiae* mannoprotein with homotypic properties of adhesion. *Eukaryot Cell* 6, 2214-2221.
20. Reynolds, T.B., Jansen, A., Peng, X., and Fink, G.R. (2008). Mat Formation in *Saccharomyces cerevisiae* Requires Nutrient and pH Gradients. *Eukaryot Cell* 7, 122-130.
21. Komano, H., Rockwell, N., Wang, G.T., Krafft, G.A., and Fuller, R.S. (1999). Purification and characterization of the yeast glycosylphosphatidylinositol-anchored, monobasic-specific aspartyl protease yapsin 2 (Mkc7p). *J Biol Chem* 274, 24431-24437.

A

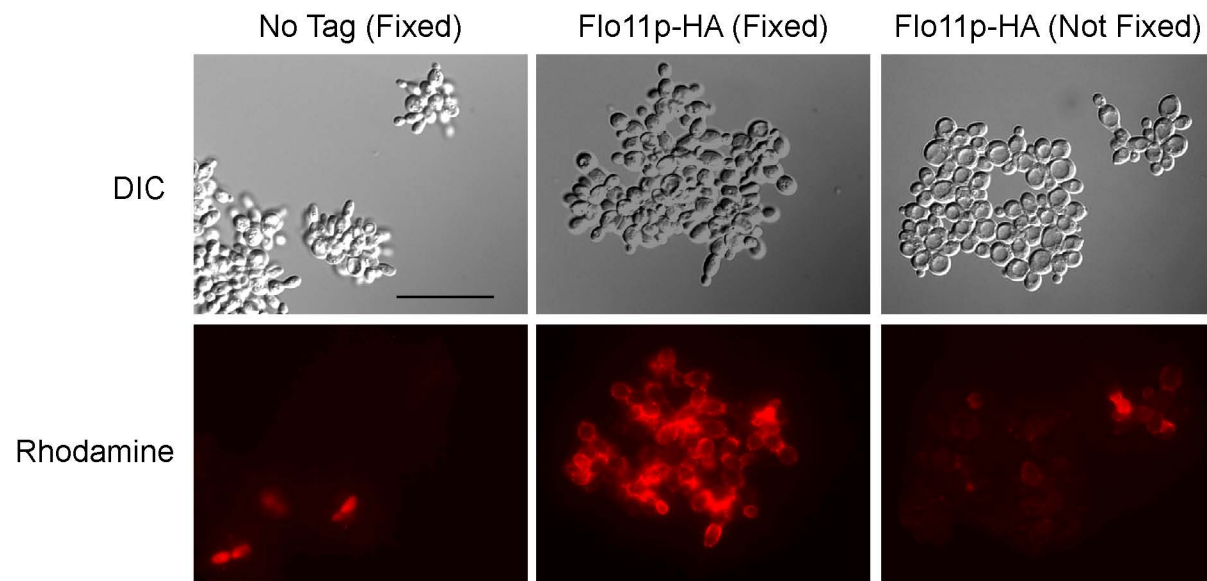

B

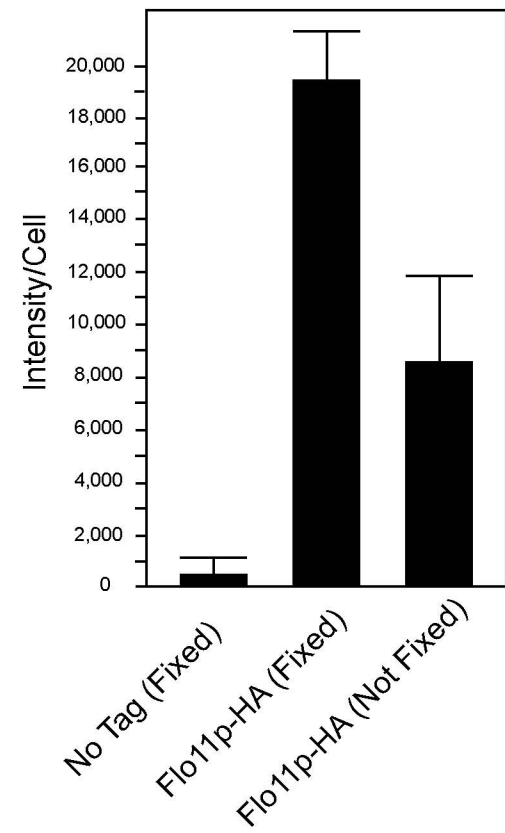

A

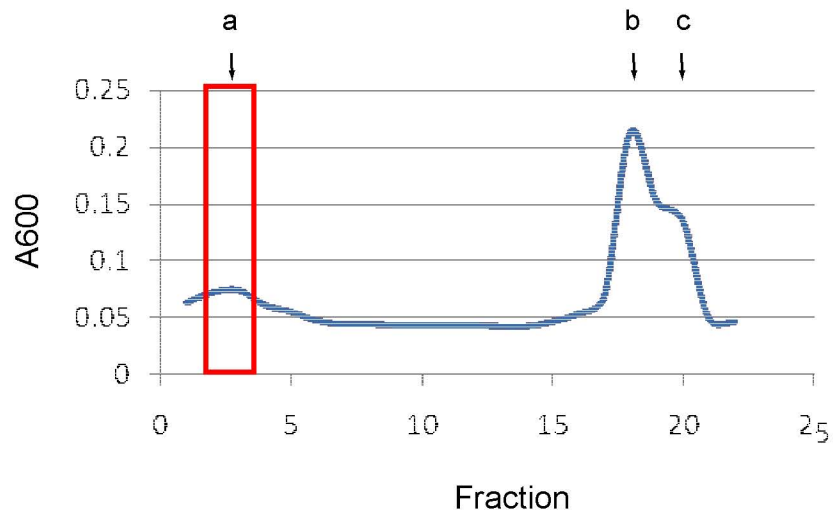

B

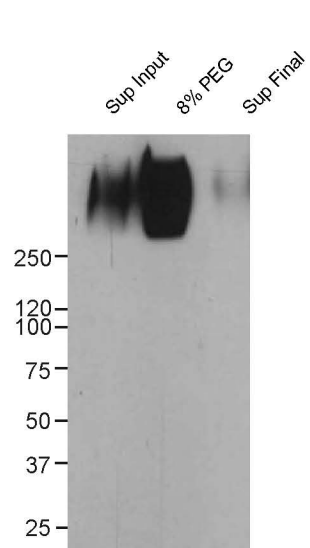

C

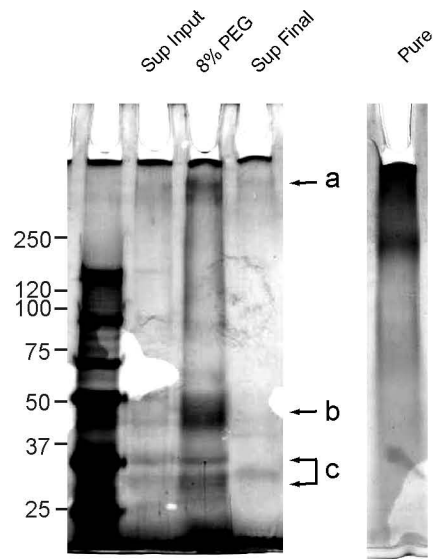

A

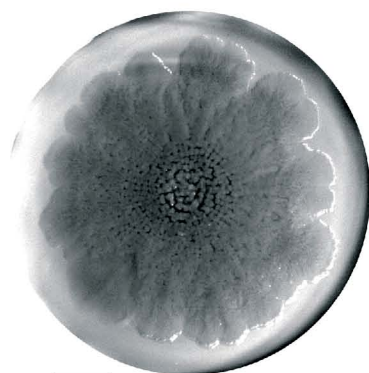

B

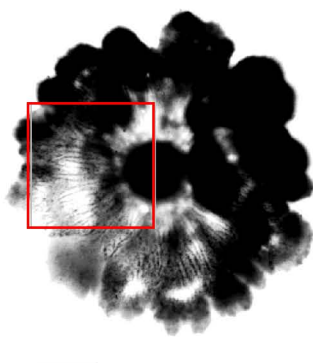

C

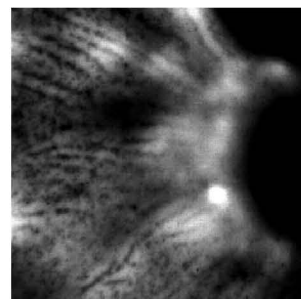

D

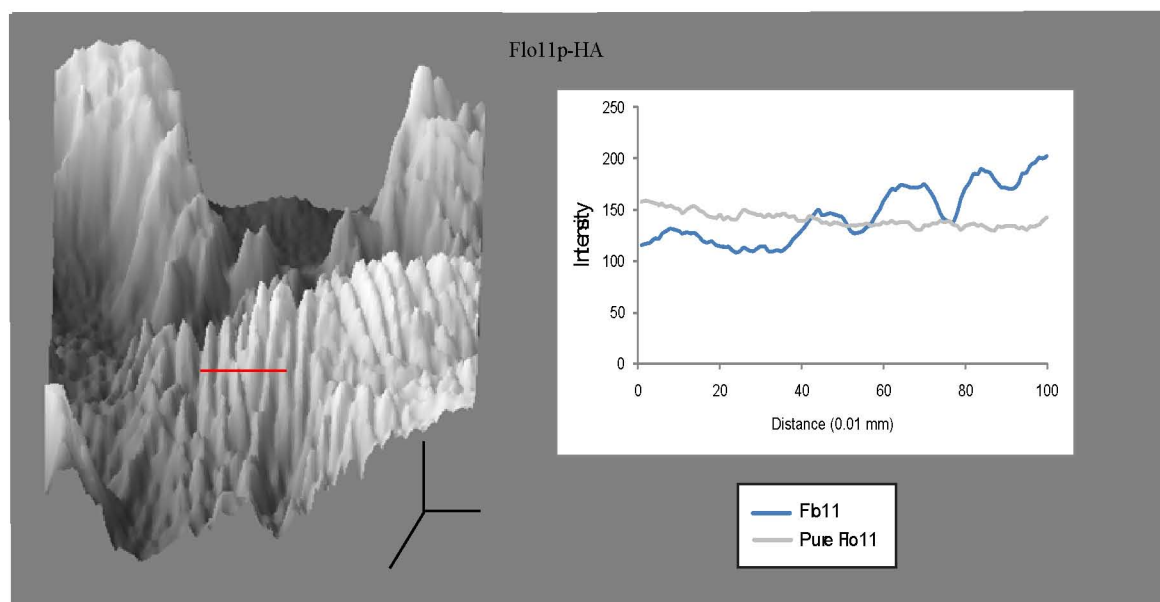

E

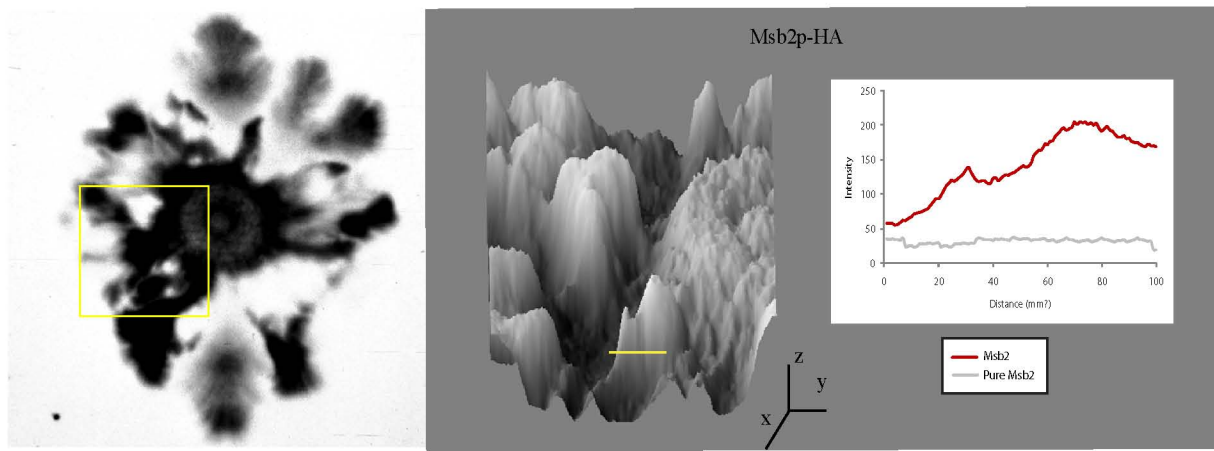

A

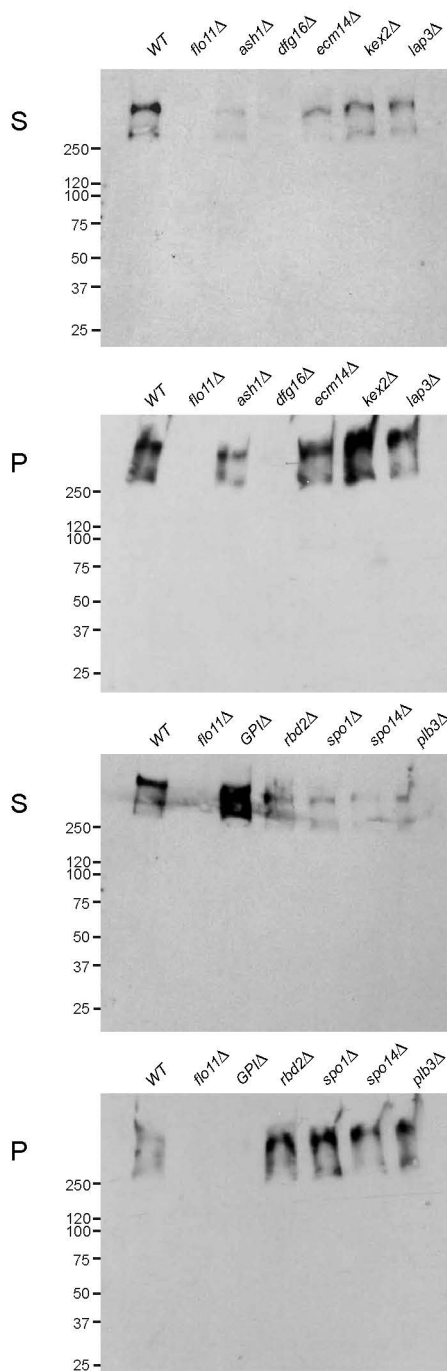

B

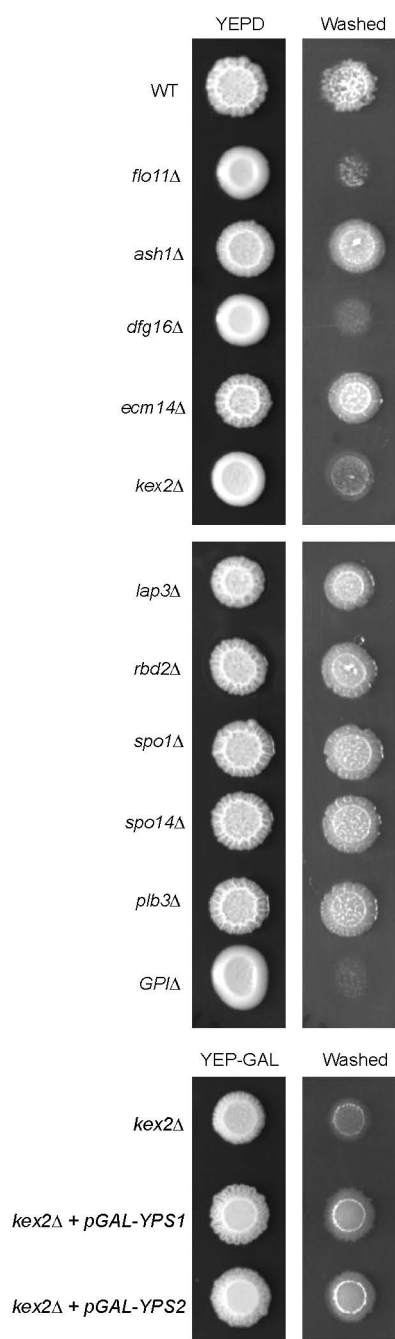

C

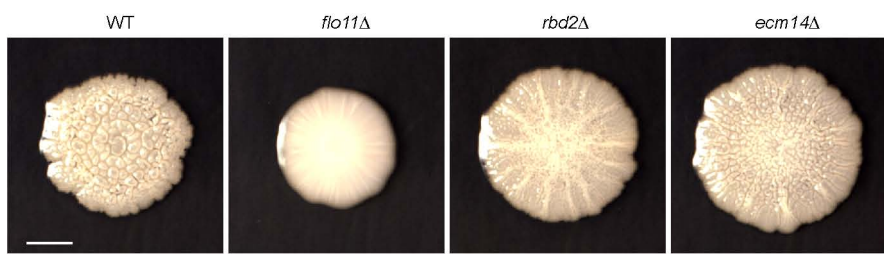

Table S1. Yeast Strains.

| Strain             | Genotype                                                                                           | Source     |
|--------------------|----------------------------------------------------------------------------------------------------|------------|
| 10560-2B           | <i>MATa</i> <i>ura3-52 his3:hisG leu2:hisG</i>                                                     | [1]        |
| PC313              | <i>MATa</i> <i>ura3-52</i>                                                                         | [2]        |
| PC538 <sup>a</sup> | <i>MATa</i> <i>ste4 FUS1-lacZ FUS1-HIS3 ura3-52</i>                                                | [3]        |
| PC999              | <i>MATa</i> <i>ste4 FUS1-lacZ FUS1-HIS3 ura3-52 MSB2-HA</i>                                        | [3]        |
| PC1519             | <i>MATa</i> <i>ste4 FUS1-lacZ FUS1-HIS3 ura3-52 pgu1::KanMX6</i>                                   | [4]        |
| PC1702             | <i>MATa</i> <i>ste4 FUS1-lacZ FUS1-HIS3 ura3-52 SHO1-HA::KanMx6</i>                                | [5]        |
| PC2740             | <i>MATa</i> <i>ste4 FUS1-lacZ FUS1-HIS3 ura3-52 HKR1-HA</i>                                        | [4]        |
| PC1083             | <i>MATa</i> <i>ste4 FUS1-lacZ FUS1-HIS3 ura3-52 GAL-MSB2-HA</i>                                    | [3]        |
| PC2382             | <i>MATa</i> <i>ura3-52 ste12::KanMX6</i>                                                           | This study |
| PC1029             | <i>MATa</i> <i>ste4 FUS1-lacZ FUS1-HIS3 ura3-52 flo11::KanMX6</i>                                  | This study |
| PC2043             | <i>MATa</i> <i>ste4 FUS1-lacZ FUS1-HIS3 ura3-52 FLO11-HA</i>                                       | This study |
| PC2090             | <i>MATa</i> <i>ste4 FUS1-lacZ FUS1-HIS3 ura3-52 FLO11-MYC</i>                                      | This study |
| PC2712             | <i>MATa</i> <i>ste4 FUS1-lacZ FUS1-HIS3 ura3-52 GAL-FLO11::KanMX6</i>                              | This study |
| PC2713             | <i>MATa</i> <i>ste4 FUS1-lacZ FUS1-HIS3 ura3-52 GAL-FLO11-HA::KanMX6</i>                           | This study |
| PC2714             | <i>MATa</i> <i>ste4 FUS1-lacZ FUS1-HIS3 ura3-52 GAL-FLO11-HA::KanMX6 msb2::URA3</i>                | This study |
| PC2716             | <i>MATa</i> <i>ste4 FUS1-lacZ FUS1-HIS3 ura3-52 GAL-MSB2-HA flo11::URA3</i>                        | This study |
| PC3415             | <i>MATa</i> <i>ste4 FUS1-lacZ FUS1-HIS3 ura3-52 FLO11-HA dfg16:URA3</i>                            | This study |
| PC3416             | <i>MATa</i> <i>ste4 FUS1-lacZ FUS1-HIS3 ura3-52 FLO11-HA rbd2:URA3</i>                             | This study |
| PC3417             | <i>MATa</i> <i>ste4 FUS1-lacZ FUS1-HIS3 ura3-52 FLO11-HA spo1:URA3</i>                             | This study |
| PC3418             | <i>MATa</i> <i>ste4 FUS1-lacZ FUS1-HIS3 ura3-52 FLO11-HA lap3:URA3</i>                             | This study |
| PC3419             | <i>MATa</i> <i>ste4 FUS1-lacZ FUS1-HIS3 ura3-52 FLO11-HA ash1:URA3</i>                             | This study |
| PC3420             | <i>MATa</i> <i>ste4 FUS1-lacZ FUS1-HIS3 ura3-52 FLO11-HA kex2:URA3</i>                             | This study |
| PC3421             | <i>MATa</i> <i>ste4 FUS1-lacZ FUS1-HIS3 ura3-52 FLO11-HA plb3:URA3</i>                             | This study |
| PC3422             | <i>MATa</i> <i>ste4 FUS1-lacZ FUS1-HIS3 ura3-52 FLO11-HA GPIA::KIURA3</i>                          | This study |
| PC3425             | <i>MATa</i> <i>ste4 FUS1-lacZ FUS1-HIS3 ura3-52 FLO11-HA FLO11-MYC@30 aa</i>                       | This study |
| PC3426             | <i>MATa</i> <i>ste4 FUS1-lacZ FUS1-HIS3 ura3-52 FLO11-HA FLO11-MYCΔ29-95</i>                       | This study |
| PC3513             | <i>MATa</i> <i>ste4 FUS1-lacZ FUS1-HIS3 ura3-52 FLO11-HA GPIA::ura3<sup>-</sup> with pGAL-SPO1</i> | This study |
| PC3515             | <i>MATa</i> <i>ste4 FUS1-lacZ FUS1-HIS3 ura3-52 FLO11-HA GPIA::ura3<sup>-</sup> pGAL-YPS1</i>      | This study |
| PC3516             | <i>MATa</i> <i>ste4 FUS1-lacZ FUS1-HIS3 ura3-52 FLO11-HA GPIA::ura3<sup>-</sup> pGAL-YPS2</i>      | This study |
| PC3700             | <i>MATa</i> <i>ste4 FUS1-lacZ FUS1-HIS3 ura3-52 FLO11-HA FLO11-MYC@30 aa kex2:URA3</i>             | This study |

a. All strains are in the Σ1278b background unless otherwise indicated.

## REFERENCES FOR TABLE S1

1. Halme, A., Bumgarner, S., Styles, C., and Fink, G.R. (2004). Genetic and epigenetic regulation of the FLO gene family generates cell-surface variation in yeast. *Cell* *116*, 405-415.
2. Liu, H., Styles, C.A., and Fink, G.R. (1993). Elements of the yeast pheromone response pathway required for filamentous growth of diploids. *Science* *262*, 1741-1744.
3. Cullen, P.J., Sabbagh, W., Jr., Graham, E., Irick, M.M., van Olden, E.K., Neal, C., Delrow, J., Bardwell, L., and Sprague, G.F., Jr. (2004). A signaling mucin at the head of the Cdc42- and MAPK-dependent filamentous growth pathway in yeast. *Genes Dev* *18*, 1695-1708.
4. Pitoniak, A., Birkaya, B., Dionne, H., Karunanithi, S., Vadiae, N., and Cullen, P.J. (IN REVISION). The Signaling Mucins Msb2 and Hkr1 Differentially Regulate the Filamentation MAPK Pathway and Contribute to a Multimodal Response. *Mol. Biol. Cell*.
5. Vadaie, N., Dionne, H., Akajagbor, D.S., Nickerson, S.R., Krysan, D.J., and Cullen, P.J. (2008). Cleavage of the signaling mucin Msb2 by the aspartyl protease Yps1 is required for MAPK activation in yeast. *J Cell Biol* *181*, 1073-1081.

Table S2. Comparative secretion profiling of yeast mucins.

| P1 | P2 | P3 | ORF            | Gene                     | Flo11p secretion           | Secretion Level | Msb2p Secretion | Hkr1p secretion | Process                 |
|----|----|----|----------------|--------------------------|----------------------------|-----------------|-----------------|-----------------|-------------------------|
| 36 | D  | 6  | <i>YKL185W</i> | <i>ASH1</i>              | Hypersecretor              | ++              | Not Tested      | Not Tested      | Cell cycle              |
| 25 | B  | 9  | <i>YFL029C</i> | <i>CAK1</i>              | Hypersecretor              | '++             | W               | W               | Cell cycle              |
| 31 | D  | 7  | <i>YMR168C</i> | <i>CEP3</i>              | Hypersecretor              | +++             | W               | W               | Cell cycle              |
| 25 | H  | 3  | <i>YBR135W</i> | <i>CKS1</i>              | Hypersecretor              | +               | W               | W               | Cell cycle              |
| 38 | D  | 6  | <i>YGL197W</i> | <i>MDS3</i>              | Hypersecretor              | +               | W               | W               | Cell cycle              |
| 42 | A  | 7  | <i>YKR077W</i> | <i>MSA2</i>              | Hypersecretor              | +++             | W               | W               | Cell cycle              |
| 27 | E  | 1  | <i>YOR368W</i> | <i>RAD17</i>             | Hypersecretor              | +               | W               | W               | Cell cycle              |
| 24 | E  | 9  | <i>YDL047W</i> | <i>SIT4</i>              | Hypersecretor              | +               | W               | W               | Cell cycle              |
| 27 | H  | 3  | <i>YNL012W</i> | <i>SPO1</i>              | Hypersecretor              | +               | W               | W               | Cell cycle              |
| 38 | B  | 3  | <i>YCL024W</i> | <i>KCC4</i>              | Hypersecretor              | +               | Not Tested      | Not Tested      | Cell Polarity           |
| 50 | H  | 5  | <i>YNR035C</i> | <i>ARC35</i>             | Hypersecretor              | ++              | W               | W               | Cell Polarity           |
| 42 | H  | 1  | <i>YHR143W</i> | <i>DSE2</i>              | Hypersecretor              | +               | W               | W               | Cell Wall               |
| 64 | H  | 2  | <i>YLR037C</i> | <i>DAN2</i>              | Hypersecretor              | +               | W               | W               | Cell Wall               |
| 21 | H  | 3  | <i>YNL190W</i> | <i>YNL190W</i>           | Hypersecretor              | '++             | W               | W               | Cell Wall               |
| 33 | E  | 12 | <i>YNL059C</i> | <i>ARP5</i>              | Hypersecretor              | '++             | W               | W               | Chromatin Remodeling    |
| 43 | E  | 2  | <i>YNL031C</i> | <i>HHT2</i>              | Hypersecretor              | ++              | W               | W               | Chromatin Remodeling    |
| 66 | F  | 6  | <i>YEL044W</i> | <i>IES6</i>              | Hypersecretor              | +               | W               | W               | Chromatin Remodeling    |
| 66 | D  | 2  | <i>YLR055C</i> | <i>SPT8</i>              | Hypersecretor              | +               | W               | W               | Chromatin Remodeling    |
| 3  | E  | 12 | <i>YBR110W</i> | <i>ALG1</i>              | Hypersecretor              | +               | W               | W               | Glycosylation           |
| 43 | G  | 11 | <i>YBR015C</i> | <i>MNN2</i>              | Hypersecretor              | ++              | W               | W               | Glycosylation           |
| 5  | D  | 7  | <i>YMR281W</i> | <i>GPI12</i>             | Hypersecretor              | +               | W               | W               | GPI anchor biosynthesis |
| 3  | A  | 11 | <i>YPL076W</i> | <i>GPI2</i>              | Hypersecretor              | ++              | W               | W               | GPI anchor biosynthesis |
| 27 | H  | 10 | <i>YOR336W</i> | <i>KRE5</i>              | Hypersecretor              | ++              | Not Tested      | W               | Metabolism              |
| 46 | D  | 2  | <i>YGL055W</i> | <i>OLE1</i>              | Undersecretor              | -               | W               | W               | Metabolism              |
| 27 | G  | 3  | <i>YJR134C</i> | <i>SGM1</i>              | Hypersecretor              | +               | Undersecretor   | W               | Metabolism              |
| 21 | H  | 11 | <i>YLR027C</i> | <i>AAT2</i>              | Hypersecretor              | +               | W               | W               | Metabolism              |
| 19 | G  | 5  | <i>YEL027W</i> | <i>CUP5</i>              | Hypersecretor              | +               | W               | W               | Metabolism              |
| 42 | F  | 1  | <i>YHR100C</i> | <i>GEP4</i>              | Hypersecretor              | +               | W               | W               | Metabolism              |
| 51 | G  | 10 | <i>YLR258W</i> | <i>GSY2</i>              | Hypersecretor              | +               | W               | W               | Metabolism              |
| 24 | F  | 8  | <i>YBR159W</i> | <i>IFA38</i>             | Hypersecretor              | '++             | W               | W               | Metabolism              |
| 43 | G  | 12 | <i>YPR159W</i> | <i>KRE6</i>              | Hypersecretor              | +               | W               | W               | Metabolism              |
| 25 | E  | 10 | <i>YJR073C</i> | <i>OPI3</i>              | Hypersecretor              | +               | W               | W               | Metabolism              |
| 34 | H  | 4  | <i>YHR150W</i> | <i>PEX28</i>             | Hypersecretor              | +               | W               | W               | Metabolism              |
| 52 | G  | 1  | <i>YMR123W</i> | <i>PKR1</i>              | Hypersecretor              | ++              | W               | W               | Metabolism              |
| 66 | H  | 7  | <i>YBR117C</i> | <i>TKL2</i>              | Hypersecretor              | +               | W               | W               | Metabolism              |
| 47 | D  | 6  | <i>YBR127C</i> | <i>VMA2</i>              | Hypersecretor              | +               | W               | W               | Metabolism              |
| 70 | H  | 11 | <i>YGR287C</i> | <i>YGR287C</i>           | Hypersecretor              | +               | W               | W               | Metabolism              |
| 20 | D  | 2  | <i>YPL215W</i> | <i>CBP3</i>              | Hypersecretor              | +               | W               | W               | Mitochondria            |
| 50 | H  | 8  | <i>YGR062C</i> | <i>COX18</i>             | Hypersecretor              | +               | W               | W               | Mitochondria            |
| 56 | D  | 2  | <i>YNL185C</i> | <i>MRPL19</i>            | Hypersecretor              | +               | W               | W               | Mitochondria            |
| 21 | D  | 2  | <i>YKR085C</i> | <i>MRPL20</i>            | Hypersecretor              | +++             | W               | Not Tested      | Mitochondria            |
| 42 | E  | 1  | <i>YHR076W</i> | <i>PTC7</i>              | Hypersecretor              | +               | W               | W               | Mitochondria            |
| 36 | A  | 1  | <i>YBR046C</i> | <i>ZTA1</i>              | Undersecretor              | -               | W               | Hypersecretor   | Mitochondria            |
| 4  | C  | 11 | <i>YPR020W</i> | <i>ATP20</i>             | Hypersecretor              | +               | W               | W               | Mitochondria            |
| 47 | E  | 4  | <i>YDR330W</i> | <i>UBX5</i>              | Hypersecretor              | +               | W               | W               | Protein Degradation     |
| 43 | D  | 2  | <i>YPL186C</i> | <i>UIP4</i>              | Hypersecretor              | +               | W               | W               | Protein Degradation     |
| 51 | F  | 11 | <i>YOL098C</i> | <i>YOL098C</i>           | Hypersecretor              | +               | W               | W               | Protein Processing      |
| 59 | F  | 2  | <i>YNL238W</i> | <i>KEX2<sup>d</sup></i>  | Hypersecretor <sup>c</sup> | +               | W               | W               | Protein Processing      |
| 58 | C  | 11 | <i>YPL246C</i> | <i>RBD2<sup>d</sup></i>  | Hypersecretor <sup>c</sup> | +               | W               | W               | Protein Processing      |
| 50 | A  | 11 | <i>YHR132C</i> | <i>ECM14<sup>d</sup></i> | Hypersecretor <sup>c</sup> | +               | W               | W               | Protein Processing      |
|    |    |    | <i>YNL012C</i> | <i>SPO1<sup>d</sup></i>  | Hypersecretor <sup>c</sup> | +               | W               | W               | Protein Processing      |
| 47 | F  | 11 | <i>YER017C</i> | <i>AFG3</i>              | Hypersecretor              | ++              | W               | W               | Protein Processing      |
| 30 | F  | 3  | <i>YLR163C</i> | <i>MAS1</i>              | Hypersecretor              | +               | W               | W               | Protein Processing      |
| 44 | H  | 3  | <i>YOR197W</i> | <i>MCA1</i>              | Hypersecretor              | ++              | W               | W               | Protein Processing      |
| 14 | A  | 12 | <i>YJR062C</i> | <i>NTA1</i>              | Hypersecretor              | ++              | W               | W               | Protein Processing      |
| 37 | G  | 7  | <i>YCL057W</i> | <i>PRD1</i>              | Hypersecretor              | ++              | W               | W               | Protein Processing      |
| 22 | A  | 12 | <i>YMR274C</i> | <i>RCE1</i>              | Hypersecretor              | +               | W               | W               | Protein Processing      |
| 32 | B  | 5  | <i>YJR117W</i> | <i>STE24</i>             | Hypersecretor              | ++              | W               | W               | Protein Processing      |
| 47 | D  | 4  | <i>YHR113W</i> | <i>YHR113W</i>           | Hypersecretor              | ++              | W               | W               | Protein Processing      |



|    |   |    |                |                |               |      |               |               |                               |
|----|---|----|----------------|----------------|---------------|------|---------------|---------------|-------------------------------|
| 49 | F | 1  | <i>YIL108W</i> | <i>YIL108W</i> | Hypersecretor | +    | W             | W             | Protein Processing            |
| 51 | G | 7  | <i>YNL239W</i> | <i>LAP3</i>    | Hypersecretor | +    | W             | W             | Protein Processing - Peptidas |
| 50 | E | 5  | <i>YBR286W</i> | <i>APE3</i>    | Hypersecretor | +++  | W             | W             | Protein Processing - Peptidas |
| 24 | B | 12 | <i>YDR136C</i> | <i>VPS61</i>   | Hypersecretor | +    | W             | W             | Protein Sorting               |
| 5  | D | 12 | <i>YOR016C</i> | <i>ERP4</i>    | Hypersecretor | +    | W             | W             | Protein Sorting               |
| 41 | E | 12 | <i>YGR223C</i> | <i>HSV2</i>    | Hypersecretor | +    | W             | Undersecretor | Protein Sorting               |
| 40 | D | 1  | <i>YFL005W</i> | <i>SEC4</i>    | Hypersecretor | +    | W             | W             | Protein Sorting               |
| 34 | H | 7  | <i>YJL192C</i> | <i>SOP4</i>    | Hypersecretor | ++   | W             | W             | Protein Sorting               |
| 27 | G | 11 | <i>YPL210C</i> | <i>SRP72</i>   | Hypersecretor | +    | W             | W             | Protein Sorting               |
| 34 | H | 5  | <i>YIL039W</i> | <i>TED1</i>    | Hypersecretor | ++   | W             | W             | Protein Sorting               |
| 24 | B | 5  | <i>YKR001C</i> | <i>VPS1</i>    | Hypersecretor | +    | W             | W             | Protein Sorting               |
| 15 | F | 1  | <i>YOL129W</i> | <i>VPS68</i>   | Hypersecretor | +    | W             | W             | Protein Sorting               |
| 50 | G | 9  | <i>YDR304C</i> | <i>CPR5</i>    | Hypersecretor | +++  | W             | W             | Protein Transport             |
| 23 | H | 5  | <i>YHR034C</i> | <i>NOP17</i>   | Hypersecretor | +    | Hypersecretor | W             | RNA Modification              |
| 16 | B | 6  | <i>YGL243W</i> | <i>TAD1</i>    | Hypersecretor | +    | W             | W             | RNA Modification              |
| 25 | D | 10 | <i>YCR063W</i> | <i>BUD31</i>   | Hypersecretor | +    | Hypersecretor | W             | RNA Modification              |
| 26 | D | 8  | <i>YLR270W</i> | <i>DCS1</i>    | Hypersecretor | +    | W             | W             | RNA Modification              |
| 72 | B | 9  | <i>YNL085W</i> | <i>MKT1</i>    | Hypersecretor | ++   | W             | W             | RNA Modification              |
| 51 | F | 3  | <i>YKR056W</i> | <i>TRM2</i>    | Hypersecretor | +    | W             | Hypersecretor | RNA Modification              |
| 50 | B | 10 | <i>YNL112W</i> | <i>DBP2</i>    | Undersecretor | -    | W             | W             | RNA Modification              |
| 38 | A | 5  | <i>YJR022W</i> | <i>LSM8</i>    | Undersecretor | -    | W             | Hypersecretor | RNA Modification              |
| 36 | C | 12 | <i>YFR014C</i> | <i>CMK1</i>    | Hypersecretor | +    | W             | W             | Signal Transduction           |
| 64 | F | 2  | <i>YFL053W</i> | <i>DAK2</i>    | Hypersecretor | ++   | W             | Not Tested    | Signal Transduction           |
| 27 | F | 2  | <i>YOR030W</i> | <i>DFG16</i>   | Hypersecretor | +    | W             | W             | Signal Transduction           |
| 26 | B | 4  | <i>YBL016W</i> | <i>FUS3</i>    | Hypersecretor | +    | W             | W             | Signal Transduction           |
| 47 | A | 5  | <i>YLL019C</i> | <i>KNS1</i>    | Hypersecretor | +    | W             | W             | Signal Transduction           |
| 52 | H | 1  | <i>YNL279W</i> | <i>PRM1</i>    | Hypersecretor | +    | W             | W             | Signal Transduction           |
| 3  | B | 10 | <i>YDL235C</i> | <i>YPD1</i>    | Hypersecretor | '+++ | W             | W             | Signal Transduction           |
| 16 | A | 7  | <i>YPR056W</i> | <i>TFB4</i>    | Hypersecretor | +    | W             | W             | Transcription                 |
| 16 | C | 12 | <i>YHL009C</i> | <i>YAP3</i>    | Hypersecretor | ++   | W             | W             | Transcription                 |
| 32 | B | 4  | <i>YOL148C</i> | <i>ADA5</i>    | Undersecretor | -    | W             | Hypersecretor | Transcription                 |
| 30 | A | 8  | <i>YKL062W</i> | <i>MSN4</i>    | Hypersecretor | +    | W             | W             | Transcription                 |
| 27 | G | 10 | <i>YKL015W</i> | <i>PUT3</i>    | Hypersecretor | +    | Undersecretor | W             | Transcription                 |
| 51 | H | 2  | <i>YPL042C</i> | <i>SSN3</i>    | Hypersecretor | +    | W             | W             | Transcription                 |
| 64 | F | 12 | <i>YDL048C</i> | <i>STP4</i>    | Hypersecretor | ++   | W             | W             | Transcription                 |
| 33 | H | 12 | <i>YGL099W</i> | <i>KRE35</i>   | Hypersecretor | ++   | Not Tested    | W             | Translation/Ribosome          |
| 14 | H | 6  | <i>YKL021C</i> | <i>MAK11</i>   | Undersecretor | -    | W             | W             | Translation/Ribosome          |
| 29 | H | 11 | <i>YJL010C</i> | <i>NOP9</i>    | Hypersecretor | '++  | W             | W             | Translation/Ribosome          |
| 53 | E | 10 | <i>YNL002C</i> | <i>RLP7</i>    | Hypersecretor | +    | W             | Hypersecretor | Translation/Ribosome          |
| 29 | G | 8  | <i>YNL236W</i> | <i>SIN4</i>    | Hypersecretor | +++  | W             | W             | Translation/Ribosome          |
| 4  | H | 4  | <i>YKL014C</i> | <i>URB1</i>    | Hypersecretor | +    | W             | W             | Translation/Ribosome          |
| 4  | F | 10 | <i>YPL195W</i> | <i>APL5</i>    | Hypersecretor | +    | W             | W             | Transport                     |
| 50 | H | 4  | <i>YCR010C</i> | <i>ATO1</i>    | Hypersecretor | +    | W             | W             | Transport                     |
| 40 | H | 2  | <i>YEL065W</i> | <i>SIT1</i>    | Hypersecretor | +    | W             | Undersecretor | Transport                     |
| 45 | G | 2  | <i>YLR092W</i> | <i>SUL2</i>    | Hypersecretor | +    | W             | W             | Transport                     |
| 16 | B | 12 | <i>YAL064W</i> | <i>YAL064W</i> | Hypersecretor | +    | W             | W             | Unknown                       |
| 34 | E | 1  | <i>YGR042W</i> | <i>YGR042W</i> | Hypersecretor | +    | W             | W             | Unknown                       |
| 26 | D | 6  | <i>YLR063W</i> | <i>YLR063W</i> | Hypersecretor | +    | W             | W             | Unknown                       |
| 42 | B | 12 | <i>YLR232W</i> | <i>YLR232W</i> | Undersecretor | -    | Not Tested    | Not Tested    | Unknown                       |
| 35 | D | 9  | <i>YGR043C</i> | <i>NQM1</i>    | Hypersecretor | +    | W             | W             | Unknown                       |
| 66 | F | 5  | <i>YCR045C</i> | <i>RRT12</i>   | Hypersecretor | +    | W             | W             | Unknown                       |
| 66 | H | 5  | <i>YDL012C</i> | <i>YDL012C</i> | Hypersecretor | +    | W             | W             | Unknown                       |
| 24 | H | 10 | <i>YDL180W</i> | <i>YDL180W</i> | Hypersecretor | +    | W             | W             | Unknown                       |
| 21 | F | 11 | <i>YGR137W</i> | <i>YGR137W</i> | Hypersecretor | +    | W             | W             | Unknown                       |
| 3  | H | 7  | <i>YGR273C</i> | <i>YGR273C</i> | Hypersecretor | +    | W             | W             | Unknown                       |
| 9  | E | 1  | <i>YMR152W</i> | <i>YIM1</i>    | Hypersecretor | +    | W             | W             | Unknown                       |
| 23 | C | 6  | <i>YJR085C</i> | <i>YJR085C</i> | Hypersecretor | ++   | W             | W             | Unknown                       |
| 42 | G | 5  | <i>YKL171W</i> | <i>YKL171W</i> | Hypersecretor | +    | W             | Undersecretor | Unknown                       |
| 42 | G | 7  | <i>YLR050C</i> | <i>YLR050C</i> | Hypersecretor | ++   | W             | W             | Unknown                       |
| 26 | C | 7  | <i>YLR149C</i> | <i>YLR149C</i> | Hypersecretor | ++   | Not Tested    | W             | Unknown                       |
| 26 | E | 8  | <i>YLR302C</i> | <i>YLR302C</i> | Hypersecretor | +    | W             | W             | Unknown                       |

|    |   |    |                |                |               |     |   |               |         |
|----|---|----|----------------|----------------|---------------|-----|---|---------------|---------|
| 59 | E | 7  | <i>YML083C</i> | <i>YML083C</i> | Hypersecretor | +   | W | W             | Unknown |
| 58 | C | 7  | <i>YMR148W</i> | <i>YMR148W</i> | Hypersecretor | +   | W | W             | Unknown |
| 4  | G | 6  | <i>YMR185W</i> | <i>YMR185W</i> | Hypersecretor | +   | W | W             | Unknown |
| 25 | H | 8  | <i>YNR014W</i> | <i>YNR014W</i> | Hypersecretor | +   | W | W             | Unknown |
| 9  | F | 6  | <i>YOL029C</i> | <i>YOL029C</i> | Hypersecretor | +   | W | W             | Unknown |
| 33 | E | 9  | <i>YOR214C</i> | <i>YOR214C</i> | Hypersecretor | ++  | W | W             | Unknown |
| 58 | B | 10 | <i>YOR376W</i> | <i>YOR376W</i> | Hypersecretor | +   | W | Not Tested    | Unknown |
| 41 | H | 3  | <i>YPR114W</i> | <i>YPR114W</i> | Hypersecretor | +++ | W | Undersecretor | Unknown |
| 34 | C | 9  | <i>YKL111C</i> | <i>YKL111C</i> | Undersecretor | -   | W | Hypersecretor | Unknown |
| 34 | B | 12 | <i>YLR282C</i> | <i>YLR282C</i> | Undersecretor | -   | W | Hypersecretor | Unknown |
| 38 | E | 4  | <i>YOL085C</i> | <i>YOL085C</i> | Undersecretor | -   | W | W             | Unknown |

- a. Flo11p-HA secretion was determined by colony immunoblot analysis. Each ORF was independently verified by retesting overexpressing plasmids from original E.coli stocks.
- b. Secretion level was estimated by comparison to neighboring spots and visually compared to colony size. Densitometry was also used to determine relative levels of Flo11p-HA secretion.
- c. Determined in strain PC999, which contains a functional Msb2p-HA fusion.
- d. Identified by directed approaches. C-terminal epitope would be expected to influence the maturation of these proteins.
- e. Phenotype of the gene deletion in PC2043.

## Function

Zinc-finger inhibitor of HO transcription; mRNA is localized and translated in the distal tip of anaphase cells, resulting in accumulation of Ash1p in daughter cell

Cyclin-dependent kinase-activating kinase required for passage through the cell cycle, phosphorylates and activates Cdc28p; nucleotide-binding pocket differs significantly

Essential kinetochore protein, component of the CBF3 complex that binds the CDEIII region of the centromere;

Cyclin-dependent protein kinase regulatory subunit and adaptor; modulates proteolysis of M-phase targets through interactions with the proteasome; role in transcription

Protein with an N-terminal kelch-like domain, putative negative regulator of early meiotic gene expression; required, with Pmd1p, for growth under alkaline conditions

Putative transcriptional activator, that interacts with G1-specific transcription factor, MBF and G1-specific promoters; ortholog of Msa2p, an MBF and SBF activator

Checkpoint protein, involved in the activation of the DNA damage and meiotic pachytene checkpoints; with Mec3p and Ddc1p, forms a clamp that is loaded onto DNA

Type 2A-related serine-threonine phosphatase that functions in the G1/S transition of the mitotic cycle; cytoplasmic and nuclear protein that modulates functions of various proteins

Meiosis-specific protein with similarity to phospholipase B, required for meiotic spindle pole body duplication and separation; required for spore formation

Protein kinase of the bud neck involved in the septin checkpoint, associates with septin proteins, negatively regulates Swe1p by phosphorylation, shows structural similarity to Swe1p

Subunit of the ARP2/3 complex, which is required for the motility and integrity of cortical actin patches; required for cortical localization of calmodulin

Daughter cell-specific secreted protein with similarity to glucanases, degrades cell wall from the daughter side causing daughter to separate from mother; expressed in daughter cells

Cell wall mannoprotein with similarity to Tir1p, Tir2p, Tir3p, and Tir4p; expressed under anaerobic conditions, completely repressed during aerobic growth

Cell wall protein of unknown function; proposed role as a hydrophilin induced by osmotic stress; contains a putative GPI-attachment site

Nuclear actin-related protein involved in chromatin remodeling, component of chromatin-remodeling enzyme complexes

Histone H3, core histone protein required for chromatin assembly, part of heterochromatin-mediated telomeric and HM silencing; one of two identical histone H3 proteins

Protein that associates with the INO80 chromatin remodeling complex under low-salt conditions; human ortholog INO80C is a member of the human INO80 complex

Subunit of the SAGA transcriptional regulatory complex but not present in SAGA-like complex SLIK/SALSA, required for SAGA-mediated inhibition at some promoters

Mannosyltransferase, involved in asparagine-linked glycosylation in the endoplasmic reticulum (ER); essential for viability, mutation is functionally complemented by Mnn1p

Alpha-1,2-mannosyltransferase, responsible for addition of the first alpha-1,2-linked mannose to form the branches on the mannan backbone of oligosaccharides, ER membrane protein involved in the second step of glycosylphosphatidylinositol (GPI) anchor assembly, the de-N-acetylation of the N-acetylglucosaminylphosphatidylinositol

Protein involved in the synthesis of N-acetylglucosaminyl phosphatidylinositol (GlcNAc-PI), the first intermediate in the synthesis of glycosylphosphatidylinositol

Protein required for beta-1,6 glucan biosynthesis; mutations result in aberrant morphology and severe growth defects

Delta(9) fatty acid desaturase, required for monounsaturated fatty acid synthesis and for normal distribution of mitochondria

Protein of unknown function, required for wild-type growth rate on galactose and mannose; localizes to COPI coated vesicles and the Golgi apparatus

Cytosolic aspartate aminotransferase, involved in nitrogen metabolism; localizes to peroxisomes in oleate-grown cells

Proteolipid subunit of the vacuolar H(+)-ATPase V0 sector (subunit c; dicyclohexylcarbodiimide binding subunit); required for vacuolar acidification and import of proteins

Protein of unknown function required for respiratory growth; detected in highly purified mitochondria in high-throughput studies; null mutation confers sensitivity to oxidative stress

Glycogen synthase, similar to Gsy1p; expression induced by glucose limitation, nitrogen starvation, heat shock, and stationary phase; activity regulated by cAMP

Microsomal beta-keto-reductase;

Protein required for beta-1,6 glucan biosynthesis; putative beta-glucan synthase; appears functionally redundant with Skn1p

Phospholipid methyltransferase (methylene-fatty-acyl-phospholipid synthase), catalyzes the last two steps in phosphatidylcholine biosynthesis

Peroxisomal integral membrane peroxin, involved in the regulation of peroxisomal size, number and distribution; genetic interactions suggest that Pex28p and Pex29p are involved in peroxisome biogenesis

V-ATPase assembly factor, functions with other V-ATPase assembly factors in the ER to efficiently assemble the V-ATPase membrane sector (V<sub>0</sub>); overproduction of V-ATPase assembly factors is lethal

Transketolase, similar to Tk11p; catalyzes conversion of xylulose-5-phosphate and ribose-5-phosphate to sedoheptulose-7-phosphate and glyceraldehyde-3-phosphate

Subunit B of the eight-subunit V1 peripheral membrane domain of the vacuolar H<sup>+</sup>-ATPase (V-ATPase), an electrogenic proton pump found throughout the endoplasmic reticulum

Isomaltase (alpha-D-glucosidase); may interact with ribosomes, based on co-purification experiments; authentic, non-tagged protein detected in purified mitochondria

Mitochondrial protein required for assembly of ubiquinol cytochrome-c reductase complex (cytochrome bc1 complex); interacts with Cbp4p and function is partially redundant with Cbp4p

Mitochondrial integral inner membrane protein required for membrane insertion of C-terminus of Cox2p; interacts genetically and physically with Mss2p and Pn1p

Mitochondrial ribosomal protein of the large subunit

Mitochondrial ribosomal protein of the large subunit

Mitochondrially localized type 2C protein phosphatase; expression induced by growth on ethanol and by sustained osmotic stress; possible role in carbon source utilization

Zeta-crystallin homolog, found in the cytoplasm and nucleus; has similarity to E. coli quinone oxidoreductase and to human zeta-crystallin, which has quinone oxidoreductase activity

Subunit g of the mitochondrial F1F0 ATP synthase; reversibly phosphorylated on two residues; unphosphorylated form is required for dimerization of the ATP synthase

UBX (ubiquitin regulatory X) domain-containing protein that interacts with Cdc48p

Protein that interacts with Ulp1p, a Ubl (ubiquitin-like protein)-specific protease for Smt3p protein conjugates; detected in a phosphorylated state in the mitochondria

Putative metalloprotease

Subtilisin-like protease (proprotein convertase), a calcium-dependent serine protease involved in the activation of proproteins of the secretory pathway

Possible rhomboid protease, has similarity to eukaryotic rhomboid proteases including Pcp1p

Putative metalloprotease with similarity to the zinc carboxypeptidase family, required for normal cell wall assembly

Meiosis-specific prospore protein; required for meiotic spindle pole body duplication and separation; required to produce bending force necessary for proper prokaryotic division

Component, with Yta12p, of the mitochondrial inner membrane m-AAA protease that mediates degradation of misfolded or unassembled proteins and is also required for mitochondrial protein import

Smaller subunit of the mitochondrial processing protease (MPP), essential processing enzyme that cleaves the N-terminal targeting sequences from mitochondria

Putative cysteine protease similar to mammalian caspases; involved in regulation of apoptosis upon hydrogen peroxide treatment; proposed to be involved in cell wall remodeling

Amidase, removes the amide group from N-terminal asparagine and glutamine residues to generate proteins with N-terminal aspartate and glutamate residues that are recognized by the proteasome

Zinc metalloendopeptidase, found in the cytoplasm and intermembrane space of mitochondria; with Cym1p, involved in degradation of mitochondrial proteins at the bud neck

Type II CAAX prenyl protease involved in the proteolysis and maturation of Ras and the a-factor mating pheromone

Highly conserved zinc metalloprotease that functions in two steps of a-factor maturation, C-terminal CAAX proteolysis and the first step of N-terminal proteolysis

Cytoplasmic aspartyl aminopeptidase; cleaves unblocked N-terminal acidic amino acid residues from peptide substrates; forms a 12 subunit homo-oligomeric complex

Putative metalloprotease

Cysteine aminopeptidase with homocysteine-thiolactonase activity; protects cells against homocysteine toxicity; has bleomycin hydrolase activity in vitro; trans vacuolar aminopeptidase Y, processed to mature form by Prb1p

Dubious ORF

Protein with similarity to Emp24p and Erv25p, member of the p24 family involved in ER to Golgi transport

Phosphatidylinositol 3,5-bisphosphate-binding protein, plays a role in micronucleophagy; predicted to fold as a seven-bladed beta-propeller; displays punctate cy Secretory vesicle-associated Rab GTPase essential for exocytosis; associates with the exocyst component Sec15p and may regulate polarized delivery of transport ER-membrane protein; suppressor of pma1-7, deletion of SOP4 slows down the export of wild-type Pma1p and Pma1-7 from the ER

Core component of the signal recognition particle (SRP) ribonucleoprotein (RNP) complex that functions in targeting nascent secretory proteins to the endoplasmic reticulum; Conserved phosphoesterase domain-containing protein that acts together with Emp24p/Erv25p in cargo exit from the ER; deletion confers sensitivity to 4-(N-(S-1)-ethyl-5-oxo-5H-tetrazol-3-yl)butanoic acid vacuolar sorting

Vacuolar membrane protein of unknown function involved in vacuolar protein sorting; also detected in the mitochondria

Peptidyl-prolyl cis-trans isomerase (cyclophilin) of the endoplasmic reticulum, catalyzes the cis-trans isomerization of peptide bonds N-terminal to proline residue Protein of unresolved function; may function in protein folding and/or rRNA processing, interacts with a chaperone (Hsp82p), two chromatin remodeling factors tRNA-specific adenosine deaminase, deaminates adenosine-37 to inosine in tRNA-Ala

Component of the SF3b subcomplex of the U2 snRNP; diploid mutants display a random budding pattern instead of the wild-type bipolar pattern

Non-essential hydrolase involved in mRNA decapping, may function in a feedback mechanism to regulate deadenylation, contains pyrophosphatase activity and ; Protein that forms a complex with Pbp1p that may mediate posttranscriptional regulation of HO endonuclease; involved in propagation of M2 dsRNA satellite of tRNA methyltransferase, 5-methylates the uridine residue at position 54 of tRNAs and may also have a role in tRNA stabilization or maturation; endo-exonuclease Essential ATP-dependent RNA helicase of the DEAD-box protein family, involved in nonsense-mediated mRNA decay and rRNA processing

Lsm (Like Sm) protein; forms heteroheptameric complex (with Lsm2p, Lsm3p, Lsm4p, Lsm5p, Lsm6p, and Lsm7p) that is part of spliceosomal U6 snRNP and is Calmodulin-dependent protein kinase; may play a role in stress response, many CA<sup>++</sup>/calmodulin dependent phosphorylation substrates demonstrated in vitro, a Dihydroxyacetone kinase, required for detoxification of dihydroxyacetone (DHA); involved in stress adaptation

Probable multiple transmembrane protein, involved in diploid invasive and pseudohyphal growth upon nitrogen starvation; required for accumulation of processed

Mitogen-activated serine/threonine protein kinase involved in mating; phosphoactivated by Ste7p; substrates include Ste12p, Far1p, Bni1p, Sst2p; inhibits invasive

Nonessential putative protein kinase of unknown cellular role; member of the LAMMER family of protein kinases, which are serine/threonine kinases also capable of Phosphorelay intermediate protein, phosphorylated by the plasma membrane sensor Sln1p in response to osmotic stress and then in turn phosphorylates the response Subunit of TFIIH complex, involved in transcription initiation, similar to 34 kDa subunit of human TFIIH; interacts with Ssl1p

Basic leucine zipper (bZIP) transcription factor

Subunit of the SAGA transcriptional regulatory complex, involved in maintaining the integrity of the complex

Transcriptional activator related to Msn2p; activated in stress conditions, which results in translocation from the cytoplasm to the nucleus; binds DNA at stress re

Transcriptional activator of proline utilization genes, constitutively binds PUT1 and PUT2 promoter sequences and undergoes a conformational change to form the Cyclin-dependent protein kinase, component of RNA polymerase II holoenzyme; involved in phosphorylation of the RNA polymerase II C-terminal domain; involved Protein containing a Kruppel-type zinc-finger domain; has similarity to Stp1p, Stp2p, and Stp3p

Putative GTPase involved in 60S ribosomal subunit biogenesis; required for the release of Nmd3p from 60S subunits in the cytoplasm

Protein involved in an early, nucleolar step of 60S ribosomal subunit biogenesis; essential for cell growth and replication of killer M1 dsRNA virus; contains four

Essential component of pre-40S ribosomes that is required for early cleavages of 35S pre-rRNA and hence formation of 18S rRNA; binds RNA in vitro and contains

Nucleolar protein with similarity to large ribosomal subunit L7 proteins; constituent of 66S pre-ribosomal particles; plays an essential role in processing of precursor Subunit of the RNA polymerase II mediator complex; associates with core polymerase subunits to form the RNA polymerase II holoenzyme; contributes to both

Nucleolar protein required for the normal accumulation of 25S and 5.8S rRNAs, associated with the 27SA2 pre-ribosomal particle; proposed to be involved in the Delta adaptin-like subunit of the clathrin associated protein complex (AP-3); functions in transport of alkaline phosphatase to the vacuole via the alternate pathway

Acetate transporter required for normal sporulation; phosphorylated in mitochondria

Ferrioxamine B transporter, member of the ARN family of transporters that specifically recognize siderophore-iron chelates; transcription is induced during iron

High affinity sulfate permease; sulfate uptake is mediated by specific sulfate transporters Sul1p and Sul2p, which control the concentration of endogenous activator Protein of unknown function; may interact with ribosomes, based on co-purification experiments

Putative protein of unknown function; green fluorescent protein (GFP)-fusion protein localizes to both the cytoplasm and the nucleus

Putative protein of unknown function; green fluorescent protein (GFP)-fusion protein localizes to the cytoplasm; YLR063W is not an essential gene

Dubious open reading frame unlikely to encode a protein, based on available experimental and comparative sequence data; partially overlaps the verified gene B1

Transaldolase of unknown function; transcription is repressed by Mot1p and induced by alpha-factor and during diauxic shift

Putative protein of unknown function; non-essential gene identified in a screen for mutants with decreased levels of rDNA transcription

Plasma membrane protein of unknown function; may contribute to Non-homologous end-joining (NHEJ) based on double deletion with htz1; YDL012C is not an essential Putative protein of unknown function; green fluorescent protein (GFP)-fusion protein localizes to the vacuole

Dubious open reading frame unlikely to encode a functional protein, based on available experimental and comparative sequence data

Putative protein of unknown function; deletion mutant has no readily detectable phenotype; expression downregulated by treatment with 8-methoxypsoralen plus

Protein of unknown function; null mutant displays sensitivity to DNA damaging agents; the authentic, non-tagged protein is detected in highly purified mitochondria

Putative protein of unknown function; GFP-fusion protein is induced in response to the DNA-damaging agent MMS; the authentic, non-tagged protein is detected

Putative protein of unknown function; predicted protein kinase; implicated in proteasome function; epitope-tagged protein localizes to the cytoplasm

Putative protein of unknown function; green fluorescent protein (GFP)-fusion protein localizes to the endoplasmic reticulum; YLR050C is not an essential gene

Putative protein of unknown function; YLR149C is not an essential gene

Dubious open reading frame unlikely to encode a functional protein, based on available experimental and comparative sequence data

Putative protein of unknown function; strong increase in transcript abundance during anaerobic growth compared to aerobic growth; cells deleted for YML083C

Putative protein of unknown function; predicted to contain a transmembrane domain; YMR148W is not an essential gene

Putative protein of unknown function; essential gene required for viability

Putative protein of unknown function; expression is cell-cycle regulated, Azf1p-dependent, and heat-inducible

Putative protein of unknown function; identified as interacting with Hsc82p and Hsp82p in high-throughput two-hybrid screens

Putative protein of unknown function; YOR214C is not an essential gene

Dubious open reading frame unlikely to encode a protein, based on available experimental and comparative sequence data; YOR376W is not an essential gene.

Putative protein of unknown function

Dubious open reading frame, unlikely to encode a protein; not conserved in closely related Saccharomyces species; partially overlaps the verified essential gene /

Dubious open reading frame unlikely to encode a functional protein, based on available experimental and comparative sequence data; deletion mutation confers a

Dubious open reading frame unlikely to encode a protein, based on experimental and comparative sequence data; partially overlaps the dubious gene YOL085W-

on

ll nuclei and inhibition of HO expression; potential Cdc28p substrate  
significantly from those of most other protein kinases

criptional regulation, recruiting proteasomal subunits to target gene promoters  
ditions

vator that regulates G1-specific transcription and cell cycle initiation  
o partial duplex DNA; homolog of human and *S. pombe* Rad1 and *U. maydis* Rec1 proteins  
s mediated by Pkc1p including cell wall and actin cytoskeleton organization

al homology to bud neck kinases Gin4p and Hsl1p

ision is repressed by cAMP

3 proteins (see HHT1); regulated by acetylation, methylation, and phosphorylation  
mplex; implicated in DNA repair based on genetic interactions with RAD52 epistasis genes  
promoters

ited by human ortholog  
s, localizes to an early Golgi compartment  
sphatidylinositol intermediate; functional homolog of human PIG-Lp  
tol (GPI) anchors; homologous to the human PIG-C protein

tant for copper and iron metal ion homeostasis  
ity to tunicamycin and DTT and decreased levels of phosphatidylethanol  
P-dependent, Snf1p and Pho85p kinases as well as by the Gac1p-Glc7p phosphatase

ex29p act at steps upstream of those mediated by Pex30p, Pex31p, and Pex32p  
n confers resistance to *Pichia farinosa* killer toxin  
phate in the pentose phosphate pathway; needed for synthesis of aromatic amino acids  
omembrane system; contains nucleotide binding sites; also detected in the cytoplasm  
ondria in high-throughput studies  
tially redundant with that of Cbp4p  
nt1p; similar to *S. cerevisiae* Oxa1, *N. crassa* Oxa2p, and *E. coli* YidC

: utilization in low oxygen environments  
xidoreductase activity  
ynthase complex

ndrial outer membrane; also detected in ER and nuclear envelope

spore membrane assembly during sporulation; has similarity to phospholipase B  
quired for correct assembly of mitochondrial enzyme complexes  
ally imported proteins  
ll cycle progression  
at are targets of ubiquitin-mediated degradation  
nd of presequence peptides cleaved from imported proteins

tic processing; contains multiple transmembrane spans  
mplex; M18 metalloprotease family member; may interact with ribosomes

cription is regulated by galactose via Gal4p; orthologous to human BLMH

cytoplasmic localization

transport vesicles to the exocyst at the plasma membrane

endoplasmic reticulum (ER) membrane

-glutathionylacetyl)amino) phenylarsenoxide (GSAO)

induced; transcriptionally induced in response to unfolded proteins in the ER

proteases (Rvb1p, Rvb2p) and two rRNA processing factors (Rrp43p, Nop58p)

contains a HIT (histidine triad) motif; interacts with neutral trehalase Nth1p

found in L-A virus; contains a DTG signature typical of retroviral proteases

associated with a role in DNA repair

is also implicated in processing of pre-tRNA, pre-snoRNA, and pre-rRNA

amino acid sequence similar to Cmk2p and mammalian Cam Kinase II

regulated by Rim101p

inhibits growth during mating by phosphorylating Tec1p, promoting its degradation

inhibits phosphorylation of tyrosine residues

SH2 domain; localizes to the shmoo tip; regulated by Ste12p

inhibits kinase regulators Ssk1p in the cytosol and Skn7p in the nucleus

response elements of responsive genes, inducing gene expression

in the active state; has a Zn(2)-Cys(6) binuclear cluster domain

involved in glucose repression

contains four beta-transducin repeats

contains

binds to the large ribosomal subunit RNAs

involved in the biogenesis of the 60S ribosomal subunit

may, suppressor of loss of casein kinase 1 function

deprivation and diauxic shift; potentially phosphorylated by Cdc28p

inactivated sulfate intermediates

RNA5

an essential gene

sensitive to UVA irradiation

used in high-throughput studies

used in highly purified mitochondria in high-throughput studies

' do not exhibit growth defects in anerobic or anaerobic conditions

ABF1

an increase in Ty1 transposition

'-A

---
